# Supplementary material for: The buildup of an urge in obsessive–compulsive disorder: Behavioral and neuroimaging correlates
Source: PubMed Central journal article supplement (PMC7082184; doi:10.1002/hbm.24898), 2020-01-09
Supplement: NIHMS1067449-supplement-Supp_FigS1.pdf [file NIHMS1067449-supplement-Supp_FigS1.pdf]

# OCD

# Controls

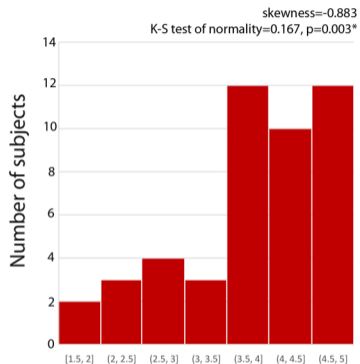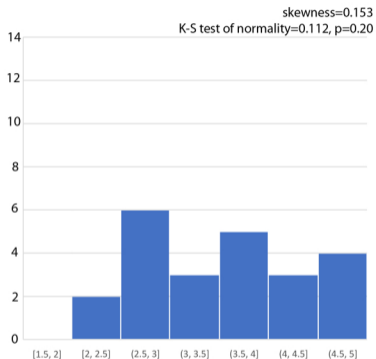

Urge ratings [bins]
